# Supplementary material for: The Effect of Age Correction on Multivariate Classification in Alzheimer’s Disease, with a Focus on the Characteristics of Incorrectly and Correctly Classified Subjects
Source: Springer Nature journal article supplement (doi:10.1007/s10548-015-0455-1), 2015-10-06
Supplement: MOESM2 [file 8837296]

## Supplementary material 2

Mean and standard deviation of MRI measures within different diagnosis groups.

|                                          | CTL (n=340)  | MCI-s (n=360) | MCI-p (n=85)  | AD (n=297)    |
|------------------------------------------|--------------|---------------|---------------|---------------|
| <b>3rd Ventricle</b>                     | 1812 ± 682   | 1909 ± 700    | 1981 ± 667    | 2150 ± 735    |
| <b>4th Ventricle</b>                     | 1844 ± 687   | 1789 ± 658    | 1780 ± 619    | 1807 ± 648    |
| <b>Accumbens area</b>                    | 399 ± 86     | 381 ± 90      | 349 ± 72      | 329 ± 76      |
| <b>Amygdala</b>                          | 1289 ± 188   | 1198 ± 231    | 1045 ± 202    | 1017 ± 222    |
| <b>Brain Stem</b>                        | 20443 ± 2248 | 20447 ± 2504  | 20239 ± 2288  | 19727 ± 2385  |
| <b>Caudate</b>                           | 3441 ± 529   | 3496 ± 601    | 3373 ± 502    | 3400 ± 658    |
| <b>Cerebellum cortex</b>                 | 45935 ± 4689 | 46137 ± 5478  | 45947 ± 4891  | 44825 ± 5317  |
| <b>Cerebellum white matter</b>           | 12590 ± 1734 | 12777 ± 2028  | 12381 ± 1850  | 12227 ± 1869  |
| <b>Corpus callosum anterior</b>          | 718 ± 132    | 710 ± 148     | 702 ± 124     | 667 ± 133     |
| <b>Corpus callosum central</b>           | 340 ± 62     | 331 ± 63      | 326 ± 61      | 309 ± 59      |
| <b>Corpus callosum midanterior</b>       | 337 ± 68     | 325 ± 72      | 321 ± 73      | 303 ± 68      |
| <b>Corpus callosum midposterior</b>      | 316 ± 75     | 302 ± 69      | 294 ± 68      | 277 ± 57      |
| <b>Corpus callosum Posterior</b>         | 863 ± 145    | 853 ± 152     | 860 ± 153     | 797 ± 139     |
| <b>Hippocampus</b>                       | 3544 ± 470   | 3191 ± 562    | 2819 ± 512    | 2660 ± 537    |
| <b>Inferior lateral ventricle</b>        | 814 ± 551    | 1109 ± 720    | 1406 ± 739    | 1710 ± 1036   |
| <b>Lateral ventricle</b>                 | 17149 ± 9481 | 20448 ± 10865 | 22559 ± 10006 | 23990 ± 12163 |
| <b>Pallidum</b>                          | 1385 ± 174   | 1402 ± 185    | 1377 ± 175    | 1328 ± 186    |
| <b>Putamen</b>                           | 4502 ± 587   | 4458 ± 624    | 4348 ± 527    | 4225 ± 658    |
| <b>Thalamus proper</b>                   | 6264 ± 662   | 6252 ± 754    | 6186 ± 677    | 6004 ± 751    |
| <b>Sulcal CSF</b>                        | 1228 ± 345   | 1352 ± 385    | 1453 ± 450    | 1472 ± 477    |
| <b>Ventral diencephalon</b>              | 3329 ± 376   | 3325 ± 404    | 3238 ± 347    | 3158 ± 384    |
| <b>Banks of superior temporal sulcus</b> | 2.25 ± 0.16  | 2.18 ± 0.17   | 2.12 ± 0.19   | 2.06 ± 0.2    |
| <b>Caudal anterior cingulate gyrus</b>   | 2.54 ± 0.23  | 2.51 ± 0.24   | 2.53 ± 0.28   | 2.53 ± 0.27   |
| <b>Caudal middle frontal gyrus</b>       | 2.29 ± 0.16  | 2.22 ± 0.17   | 2.2 ± 0.17    | 2.15 ± 0.2    |
| <b>Cuneus cortex</b>                     | 1.62 ± 0.1   | 1.62 ± 0.12   | 1.6 ± 0.11    | 1.6 ± 0.13    |
| <b>Entorhinal cortex</b>                 | 3.32 ± 0.33  | 3.06 ± 0.44   | 2.79 ± 0.48   | 2.65 ± 0.47   |
| <b>Frontal pole</b>                      | 2.6 ± 0.24   | 2.54 ± 0.25   | 2.5 ± 0.25    | 2.46 ± 0.28   |
| <b>Fusiform gyrus</b>                    | 2.48 ± 0.15  | 2.4 ± 0.16    | 2.33 ± 0.18   | 2.25 ± 0.21   |
| <b>Inferior parietal cortex</b>          | 2.16 ± 0.14  | 2.09 ± 0.16   | 2.04 ± 0.18   | 1.98 ± 0.19   |
| <b>Inferior temporal gyrus</b>           | 2.63 ± 0.15  | 2.55 ± 0.17   | 2.45 ± 0.19   | 2.39 ± 0.23   |
| <b>Insular cortex</b>                    | 2.81 ± 0.16  | 2.75 ± 0.18   | 2.71 ± 0.17   | 2.65 ± 0.23   |
| <b>Isthmus cingulate cortex</b>          | 2.15 ± 0.17  | 2.1 ± 0.18    | 2.06 ± 0.17   | 2 ± 0.2       |
| <b>Lateral occipital cortex</b>          | 1.95 ± 0.13  | 1.91 ± 0.13   | 1.88 ± 0.14   | 1.85 ± 0.17   |
| <b>Lateral orbito frontal cortex</b>     | 2.44 ± 0.15  | 2.4 ± 0.16    | 2.38 ± 0.16   | 2.32 ± 0.19   |
| <b>Lingual gyrus</b>                     | 1.75 ± 0.1   | 1.73 ± 0.11   | 1.73 ± 0.11   | 1.68 ± 0.12   |
| <b>Medial orbito frontal cortex</b>      | 2.27 ± 0.15  | 2.23 ± 0.17   | 2.18 ± 0.17   | 2.14 ± 0.19   |
| <b>Middle temporal gyrus</b>             | 2.64 ± 0.14  | 2.54 ± 0.17   | 2.46 ± 0.19   | 2.39 ± 0.22   |
| <b>Paracentral sulcus</b>                | 2.07 ± 0.18  | 2.02 ± 0.18   | 2.02 ± 0.19   | 2.01 ± 0.22   |
| <b>Parahippocampal gyrus</b>             | 2.51 ± 0.28  | 2.34 ± 0.32   | 2.27 ± 0.33   | 2.17 ± 0.33   |
| <b>Parsopercularis gyrus</b>             | 2.32 ± 0.15  | 2.28 ± 0.16   | 2.27 ± 0.15   | 2.21 ± 0.19   |

|                                         |             |             |             |             |
|-----------------------------------------|-------------|-------------|-------------|-------------|
| <b>Parsorbitalis gyrus</b>              | 2.52 ± 0.19 | 2.46 ± 0.2  | 2.45 ± 0.19 | 2.39 ± 0.22 |
| <b>Parstriangularis gyrus</b>           | 2.19 ± 0.15 | 2.14 ± 0.15 | 2.13 ± 0.17 | 2.1 ± 0.17  |
| <b>Pericalcarine cortex</b>             | 1.38 ± 0.08 | 1.38 ± 0.11 | 1.36 ± 0.1  | 1.36 ± 0.11 |
| <b>Postcentral gyrus</b>                | 1.8 ± 0.13  | 1.77 ± 0.13 | 1.76 ± 0.15 | 1.72 ± 0.14 |
| <b>Posterior cingulate gyrus</b>        | 2.29 ± 0.15 | 2.23 ± 0.14 | 2.21 ± 0.16 | 2.18 ± 0.18 |
| <b>Precentral gyrus</b>                 | 2.19 ± 0.18 | 2.13 ± 0.19 | 2.15 ± 0.21 | 2.08 ± 0.21 |
| <b>Precuneus cortex</b>                 | 2.05 ± 0.14 | 2 ± 0.15    | 1.96 ± 0.16 | 1.91 ± 0.18 |
| <b>Rostral anterior cingulate gyrus</b> | 2.72 ± 0.2  | 2.68 ± 0.22 | 2.67 ± 0.23 | 2.65 ± 0.26 |
| <b>Rostral middle frontal gyrus</b>     | 2.15 ± 0.14 | 2.1 ± 0.15  | 2.07 ± 0.15 | 2.02 ± 0.16 |
| <b>Superior frontal gyrus</b>           | 2.47 ± 0.16 | 2.4 ± 0.16  | 2.38 ± 0.17 | 2.34 ± 0.19 |
| <b>Superior parietal gyrus</b>          | 1.91 ± 0.14 | 1.87 ± 0.16 | 1.84 ± 0.15 | 1.8 ± 0.19  |
| <b>Superior temporal gyrus</b>          | 2.5 ± 0.16  | 2.42 ± 0.17 | 2.35 ± 0.19 | 2.29 ± 0.21 |
| <b>Supramarginal gyrus</b>              | 2.24 ± 0.15 | 2.19 ± 0.16 | 2.16 ± 0.18 | 2.09 ± 0.19 |
| <b>Temporal pole</b>                    | 3.56 ± 0.29 | 3.39 ± 0.35 | 3.22 ± 0.37 | 3.17 ± 0.41 |
| <b>Transverse temporal gyrus</b>        | 2.08 ± 0.23 | 2.04 ± 0.23 | 2.03 ± 0.26 | 1.96 ± 0.29 |

Data is represented as mean ± standard deviation, *CTL* control subjects, *MCI* mild cognitive impairment, *MCI-s* stable MCI, *MCI-p* progressive MCI, *AD* Alzheimer's disease, *CSF* cerebrospinal fluid.
