# Supplementary material for: The Effect of Age Correction on Multivariate Classification in Alzheimer’s Disease, with a Focus on the Characteristics of Incorrectly and Correctly Classified Subjects
Source: Springer Nature journal article supplement (doi:10.1007/s10548-015-0455-1), 2015-10-06
Supplement: MOESM3 [file 8837296]

### Supplementary material 3

Pearson correlation coefficients between MRI measures and age, before and after age correction.

|                                   | CTL      |               | MCI      |               | AD       |               |
|-----------------------------------|----------|---------------|----------|---------------|----------|---------------|
|                                   | Original | Age-corrected | Original | Age-corrected | Original | Age-corrected |
| 3rd Ventricle                     | 0.325**  | 0             | 0.298**  | -0.090*       | 0.276**  | -0.096        |
| 4th Ventricle                     | 0.150**  | 0             | 0.068    | -0.124**      | 0.136*   | -0.059        |
| Accumbens area                    | -0.282** | 0             | -0.341** | -0.002        | -0.211** | 0.181**       |
| Amygdala                          | -0.272** | 0             | -0.141** | 0.128**       | -0.144*  | 0.137*        |
| Brain Stem                        | -0.119*  | 0             | -0.212** | -0.083        | -0.170** | -0.035        |
| Caudate                           | 0.166**  | 0             | 0.098*   | -0.086        | 0.228**  | 0.067         |
| Cerebellum cortex                 | -0.146** | 0             | -0.295** | -0.144**      | -0.262** | -0.109        |
| Cerebellum white matter           | -0.227** | 0             | -0.341** | -0.109*       | -0.316** | -0.062        |
| Corpus callosum anterior          | -0.300** | 0             | -0.329** | 0.014         | -0.301** | 0.065         |
| Corpus callosum central           | -0.231** | 0             | -0.326** | -0.046        | -0.310** | -0.016        |
| Corpus callosum midanterior       | -0.304** | 0             | -0.352** | -0.001        | -0.265** | 0.106         |
| Corpus callosum midposterior      | -0.262** | 0             | -0.285** | 0.067         | -0.214** | 0.212**       |
| Corpus callosum Posterior         | -0.136*  | 0             | -0.227** | -0.069        | -0.179** | -0.005        |
| Hippocampus                       | -0.426** | 0             | -0.369** | 0.066         | -0.326** | 0.135*        |
| Inferior lateral ventricle        | 0.371**  | 0             | 0.357**  | 0.025         | 0.317**  | 0.08          |
| Lateral ventricle                 | 0.330**  | 0             | 0.300**  | -0.048        | 0.265**  | -0.051        |
| Pallidum                          | -0.064   | 0             | -0.155** | -0.082        | -0.204** | -0.132*       |
| Putamen                           | -0.034   | 0             | -0.141** | -0.102*       | -0.059   | -0.022        |
| Thalamus proper                   | -0.217** | 0             | -0.307** | -0.076        | -0.229** | 0.004         |
| Sulcal CSF                        | 0.225**  | 0             | 0.216**  | -0.015        | 0.185**  | -0.014        |
| Ventral diencephalon              | -0.163** | 0             | -0.236** | -0.049        | -0.309** | -0.118*       |
| Banks of superior temporal sulcus | -0.176** | 0             | -0.113*  | 0.072         | 0.041    | 0.206**       |
| Caudal anterior cingulate gyrus   | 0.117*   | 0             | 0.053    | -0.08         | 0.074    | -0.046        |
| Caudal middle frontal gyrus       | -0.180** | 0             | -0.218** | -0.002        | -0.069   | 0.115*        |
| Cuneus cortex                     | -0.125*  | 0             | -0.108*  | 0.026         | -0.099   | 0.02          |
| Entorhinal cortex                 | -0.179** | 0             | -0.216** | -0.061        | -0.298** | -0.152**      |
| Frontal pole                      | -0.171** | 0             | -0.178** | 0.025         | -0.185** | -0.004        |
| Fusiform gyrus                    | -0.255** | 0             | -0.216** | 0.072         | -0.185** | 0.039         |
| Inferior parietal cortex          | -0.262** | 0             | -0.147** | 0.134**       | 0.046    | 0.279**       |
| Inferior temporal gyrus           | -0.202** | 0             | -0.205** | 0             | -0.087   | 0.073         |
| Insular cortex                    | -0.155** | 0             | -0.139** | 0.035         | -0.149** | -0.014        |
| Isthmus cingulate cortex          | -0.170** | 0             | -0.139** | 0.069         | -0.043   | 0.139*        |
| Lateral occipital cortex          | -0.284** | 0             | -0.244** | 0.092*        | -0.107   | 0.161**       |
| Lateral orbito frontal cortex     | -0.224** | 0             | -0.174** | 0.08          | -0.197** | 0.016         |
| Lingual gyrus                     | -0.225** | 0             | -0.220** | 0.041         | -0.153** | 0.085         |
| Medial orbito frontal cortex      | -0.108*  | 0             | -0.134** | -0.02         | -0.219** | -0.121*       |
| Middle temporal gyrus             | -0.215** | 0             | -0.172** | 0.036         | -0.113   | 0.054         |
| Paracentral sulcus                | -0.142** | 0             | -0.200** | -0.023        | -0.136*  | 0.007         |
| Parahippocampal gyrus             | -0.175** | 0             | -0.145** | 0.043         | -0.215** | -0.033        |

|                                         |          |   |          |         |          |          |
|-----------------------------------------|----------|---|----------|---------|----------|----------|
| <b>Parsopercularis gyrus</b>            | -0.133*  | 0 | -0.193** | -0.038  | -0.135*  | 0        |
| <b>Parsorbitalis gyrus</b>              | -0.168** | 0 | -0.183** | 0.005   | -0.194** | -0.024   |
| <b>Parstriangularis gyrus</b>           | -0.133*  | 0 | -0.254** | -0.103* | -0.230** | -0.09    |
| <b>Pericalcarine cortex</b>             | -0.125*  | 0 | -0.108*  | 0.006   | -0.047   | 0.072    |
| <b>Postcentral gyrus</b>                | -0.124*  | 0 | -0.251** | -0.103* | -0.195** | -0.057   |
| <b>Posterior cingulate gyrus</b>        | -0.099   | 0 | -0.046   | 0.076   | -0.026   | 0.073    |
| <b>Precentral gyrus</b>                 | -0.218** | 0 | -0.308** | -0.062  | -0.231** | -0.008   |
| <b>Precuneus cortex</b>                 | -0.180** | 0 | -0.155** | 0.049   | -0.001   | 0.164**  |
| <b>Rostral anterior cingulate gyrus</b> | 0.042    | 0 | -0.05    | -0.096* | -0.108   | -0.148*  |
| <b>Rostral middle frontal gyrus</b>     | -0.185** | 0 | -0.257** | -0.043  | -0.143*  | 0.058    |
| <b>Superior frontal gyrus</b>           | -0.288** | 0 | -0.287** | 0.066   | -0.207** | 0.095    |
| <b>Superior parietal gyrus</b>          | -0.142** | 0 | -0.137** | 0.02    | -0.024   | 0.108    |
| <b>Superior temporal gyrus</b>          | -0.365** | 0 | -0.324** | 0.075   | -0.296** | 0.028    |
| <b>Supramarginal gyrus</b>              | -0.222** | 0 | -0.219** | 0.035   | -0.105   | 0.113    |
| <b>Temporal pole</b>                    | -0.234** | 0 | -0.191** | 0.045   | -0.255** | -0.054   |
| <b>Transverse temporal gyrus</b>        | -0.131*  | 0 | -0.250** | -0.100* | -0.287** | -0.166** |

*CTL* control subjects, *MCI* mild cognitive impairment, *AD* Alzheimer's disease, *CSF*=cerebrospinal fluid.

\* Correlation is significant at the 0.05 level (2-tailed)

\*\* Correlation is significant at the 0.01 level (2-tailed).
